# Supplementary figures and images for: Combined Toxicity of the Most Common Indoor Aspergilli
Source: MDPI journal article supplement (doi:10.3390/pathogens12030459), 2023-03-14

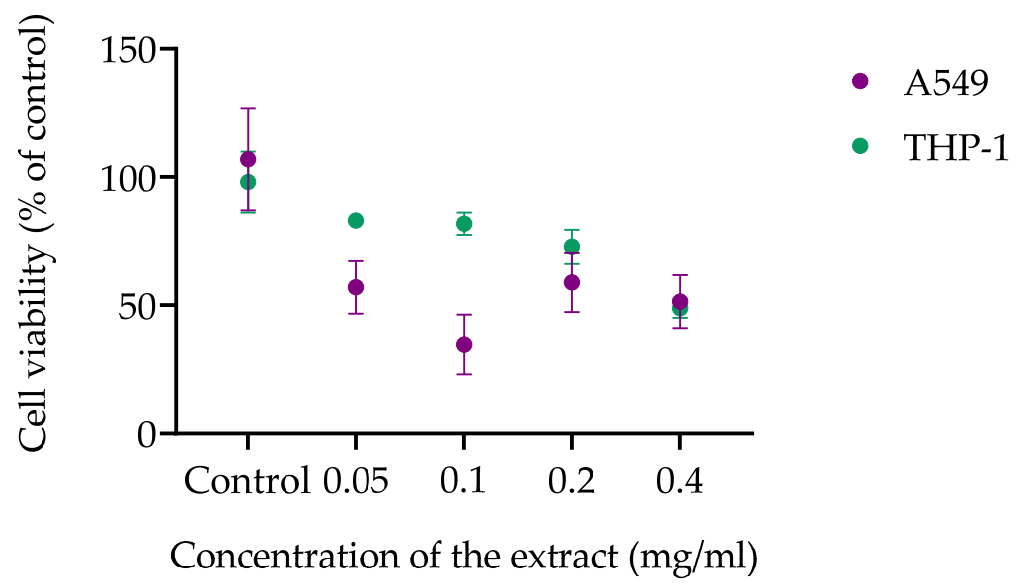

**Figure S1.** Cytotoxicity of extracted *A. protuberus* on A549 cells and THP-1 macrophages.

Supplement: s1 [file s1]
